# Supplementary material
Source: PubMed Central journal article supplement (PMC7266646)
Supplement: NIHMS1553507-supplement-1.pdf [file NIHMS1553507-supplement-1.pdf]

**Supplemental Table 1  
Manipulation Check Results**

| N                                                                     | M (SD)                  | N   | M (SD)                     | Statistical Difference                        |
|-----------------------------------------------------------------------|-------------------------|-----|----------------------------|-----------------------------------------------|
| <b><i>The products are safer than traditional cigarettes.</i></b>     |                         |     |                            |                                               |
|                                                                       | Modified Risk Statement |     | No Modified Risk Statement |                                               |
| 304                                                                   | 2.34 (.78)              | 301 | 1.51 (.70)                 | F (1, 603) = 190.82, p < .001, $\eta^2 = .24$ |
| <b><i>The products contain nicotine.</i></b>                          |                         |     |                            |                                               |
|                                                                       | FDA Warning Label       |     | No Warning Label           |                                               |
| 204                                                                   | 2.93 (.32)              | 49  | 1.76 (.75)                 | F (1, 251) = 285.26, p < .001, $\eta^2 = .53$ |
| <b><i>The products increase heart-rate.</i></b>                       |                         |     |                            |                                               |
|                                                                       | MarkTen Warning Label   |     | No Warning Label           |                                               |
| 202                                                                   | 2.38 (.73)              | 50  | 1.56 (.58)                 | F (1, 250) = 55.40, p < .001, $\eta^2 = .18$  |
| <b><i>The long-term health risks of the products are unknown.</i></b> |                         |     |                            |                                               |
|                                                                       | Abstract Warning Label  |     | No Warning Label           |                                               |
| 199                                                                   | 2.75 (.60)              | 50  | 1.50 (.58)                 | F (1, 247) = 177.45, p < .001, $\eta^2 = .42$ |
